# Supplementary material
Source: PubMed Central journal article supplement (PMC6400768)
Supplement: 13197_2018_3521_MOESM1_ESM.pdf [file 13197_2018_3521_MOESM1_ESM.pdf]

## **Supplementary Notes**

Development of Shelf Life Kinetic Model for Fresh Rainbow Trout  
(*Oncorhynchus Mykiss*) Fillets Stored under Modified Atmosphere  
Packaging

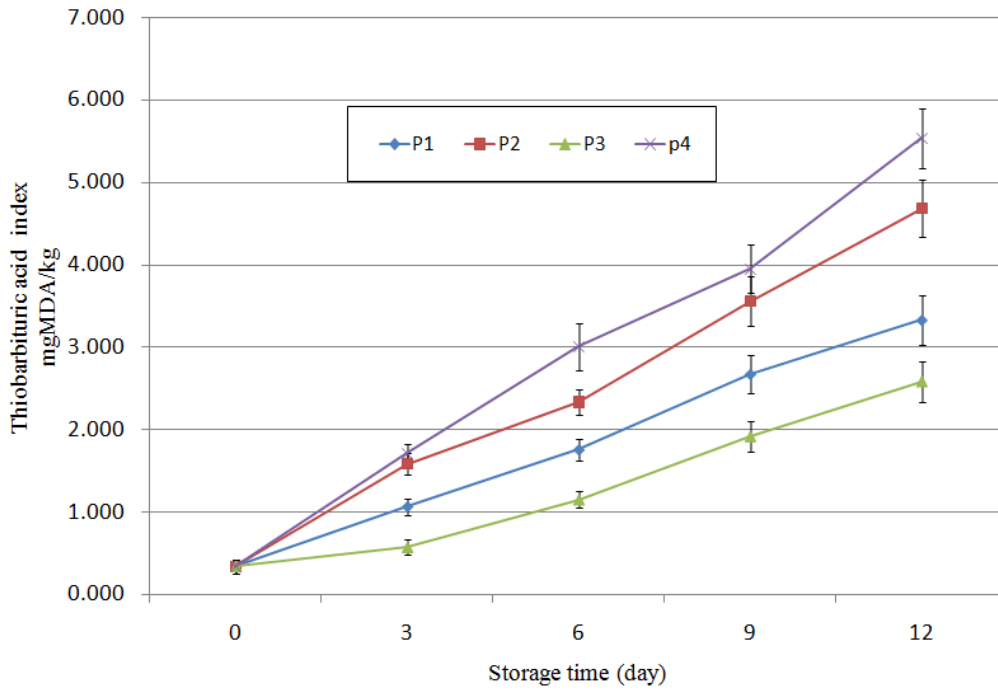

**Fig. Sup-1.** The trend of the thiobarbituric acid index (mg MDA/kg) in rainbow trout stored at four types of modified atmosphere packaging (including P<sub>1</sub>:80%CO<sub>2</sub>/10%N<sub>2</sub>/10%O<sub>2</sub>, P<sub>2</sub>:60%CO<sub>2</sub>/20%N<sub>2</sub>/20%O<sub>2</sub>, P<sub>3</sub>:60%CO<sub>2</sub>/40%N<sub>2</sub>/20%O<sub>2</sub>, and P<sub>4</sub>:40%CO<sub>2</sub>/30%N<sub>2</sub>/30%O<sub>2</sub>) during storage time

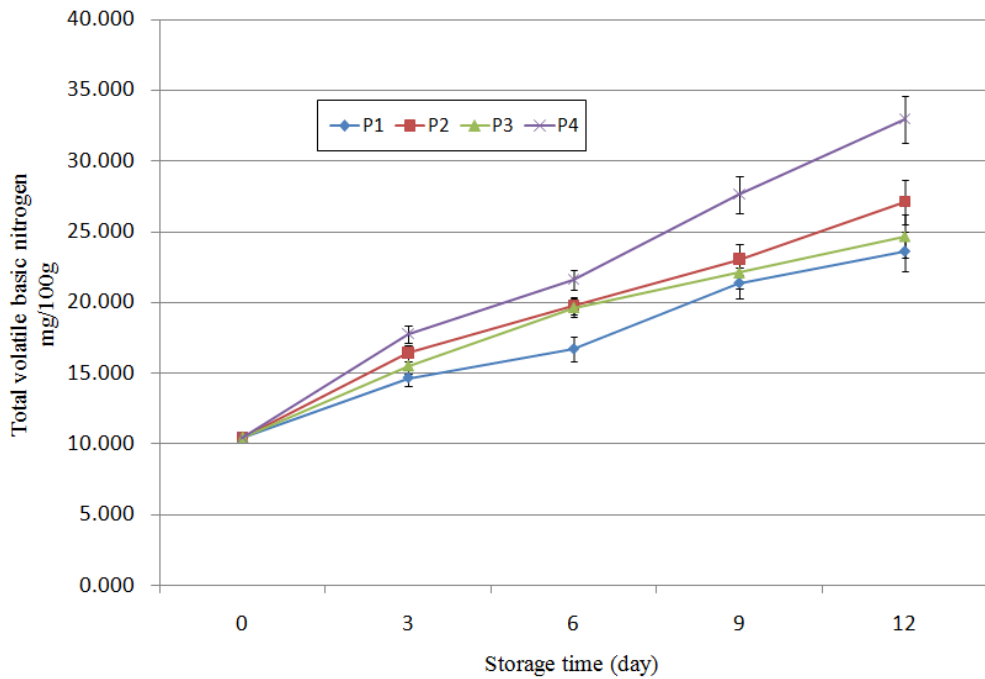

**Fig. Sup-2.** The variation in the total volatile basic nitrogen (mg/100g) in rainbow trout stored in four types of modified atmosphere packaging (including P<sub>1</sub>:80%CO<sub>2</sub>/10%N<sub>2</sub>/10%O<sub>2</sub>, P<sub>2</sub>:60%CO<sub>2</sub>/20%N<sub>2</sub>/20%O<sub>2</sub>, P<sub>3</sub>:60%CO<sub>2</sub>/40%N<sub>2</sub>/20%O<sub>2</sub>, and P<sub>4</sub>:40%CO<sub>2</sub>/30%N<sub>2</sub>/30%O<sub>2</sub>) during storage time

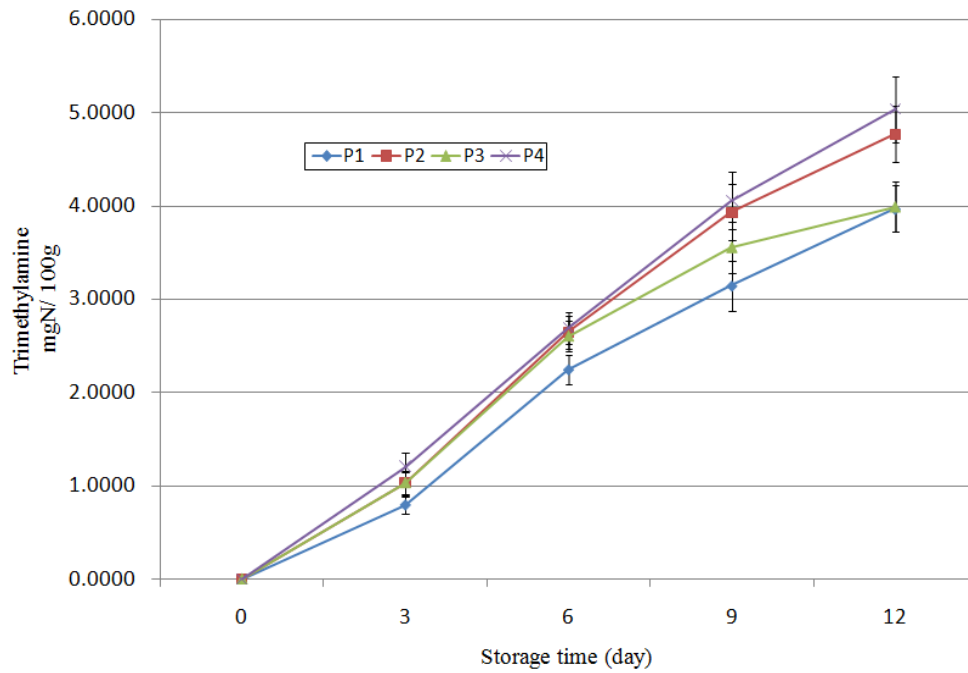

**Fig. Sup-3.** The trend of trimethylamine variations (mgN/100g) in rainbow trout fish stored in four types of modified atmosphere packaging (including P<sub>1</sub>:80%CO<sub>2</sub>/10%N<sub>2</sub>/10%O<sub>2</sub>, P<sub>2</sub>:60%CO<sub>2</sub>/20%N<sub>2</sub>/20%O<sub>2</sub>, P<sub>3</sub>:60%CO<sub>2</sub>/40%N<sub>2</sub>/20%O<sub>2</sub>, and P<sub>4</sub>:40%CO<sub>2</sub>/30%N<sub>2</sub>/30%O<sub>2</sub>) during storage time

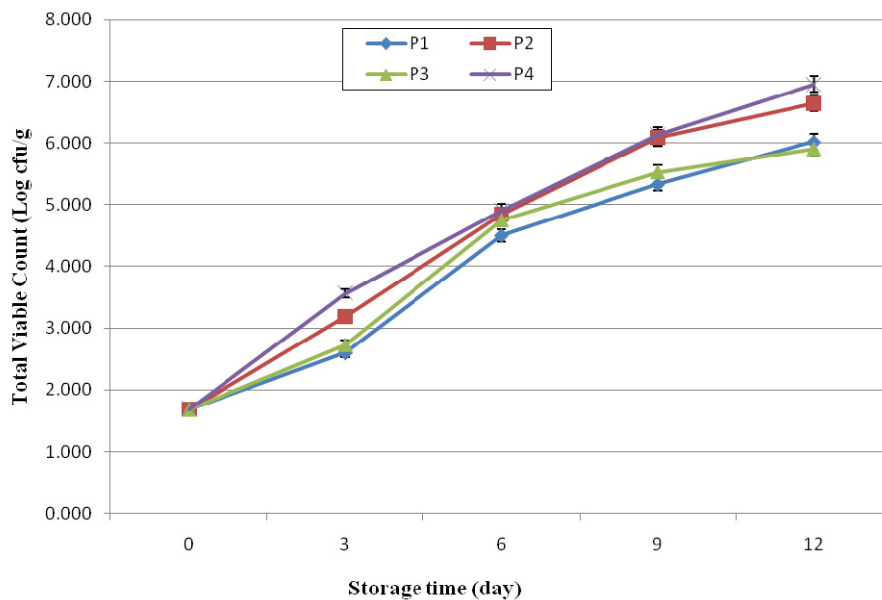

**Fig. Sup-4.** Changes of the total viable count (log cfu/g) in rainbow trout stored in four types of modified atmosphere packaging (including P<sub>1</sub>:80%CO<sub>2</sub>/10%N<sub>2</sub>/10%O<sub>2</sub>, P<sub>2</sub>:60%CO<sub>2</sub>/20%N<sub>2</sub>/20%O<sub>2</sub>, P<sub>3</sub>:60%CO<sub>2</sub>/40%N<sub>2</sub>/20%O<sub>2</sub>, and P<sub>4</sub>:40%CO<sub>2</sub>/30%N<sub>2</sub>/30%O<sub>2</sub>) during storage time

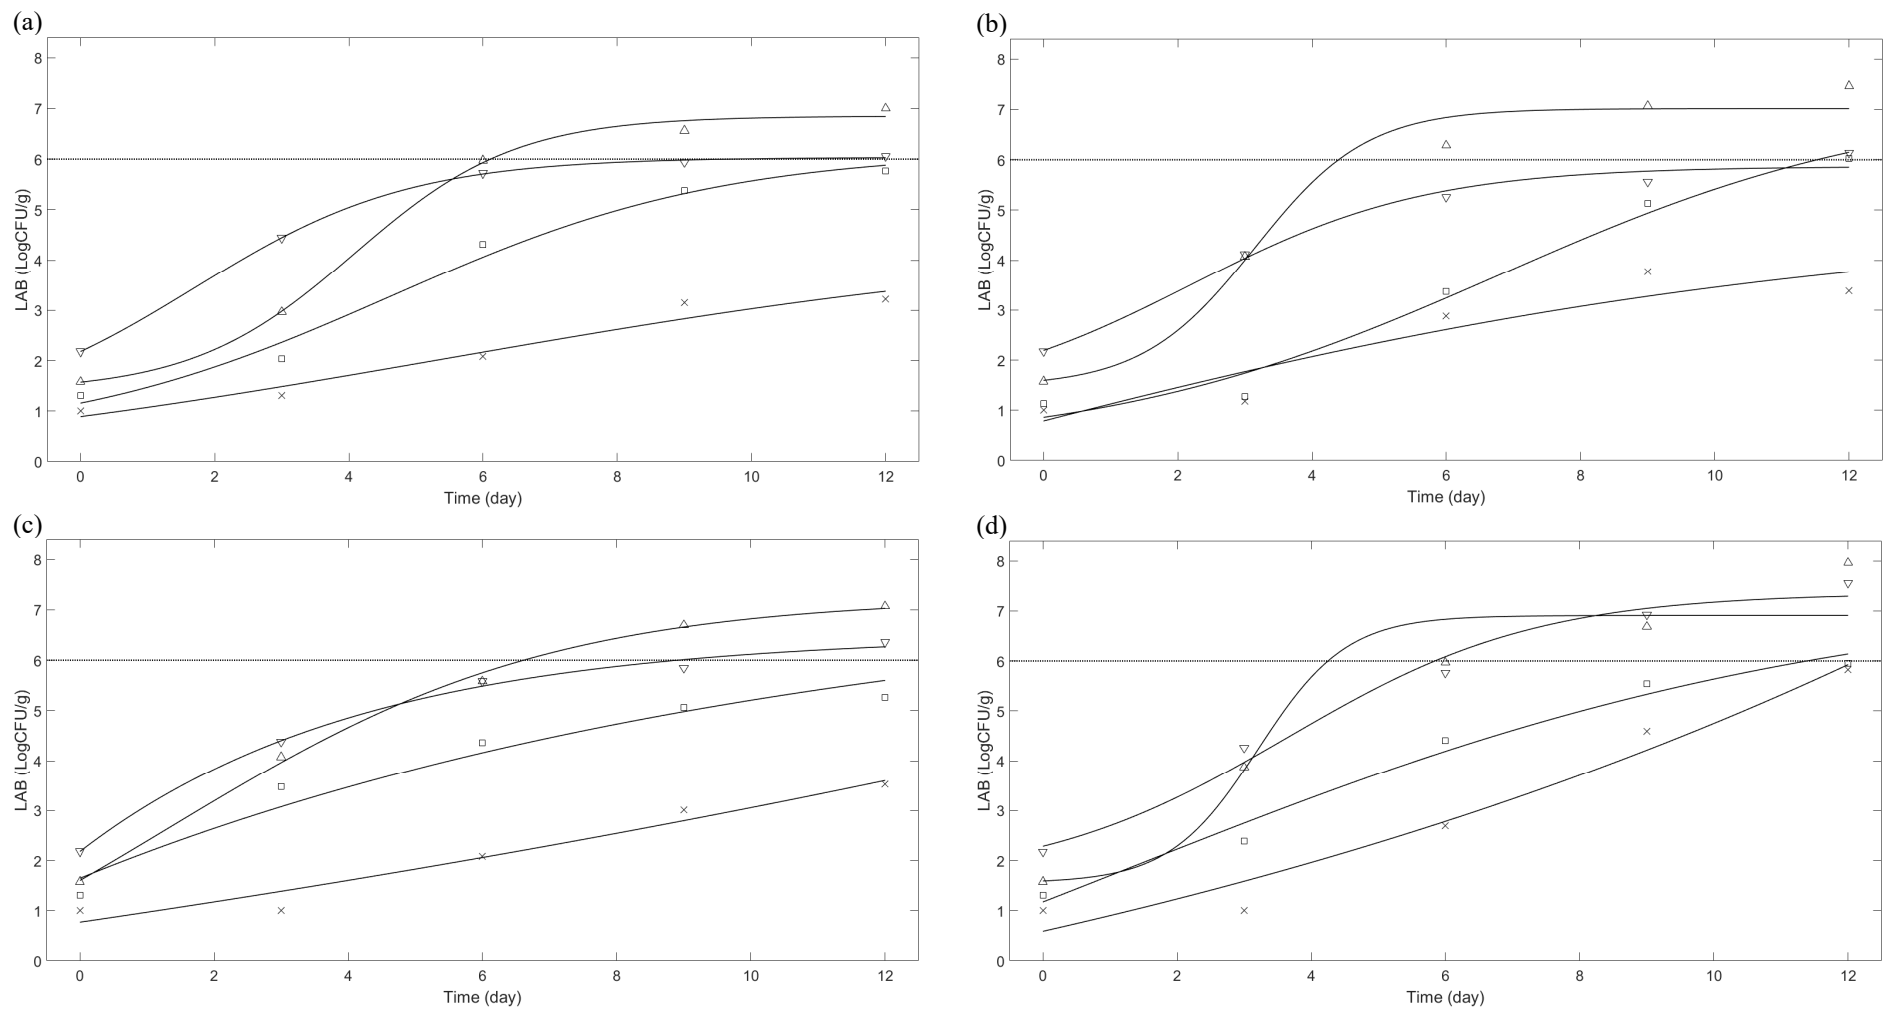

**Fig. Sup-5.** The growth curve of the lactic acid bacteria (log cfu/g) in the rainbow trout for (a) P<sub>1</sub>:80%CO<sub>2</sub>/10%N<sub>2</sub>/10%O<sub>2</sub>, (b) P<sub>2</sub>:60%CO<sub>2</sub>/20%N<sub>2</sub>/20%O<sub>2</sub>, (c) P<sub>3</sub>:60%CO<sub>2</sub>/40%N<sub>2</sub>/20%O<sub>2</sub>, and (d) P<sub>4</sub>:40%CO<sub>2</sub>/30%N<sub>2</sub>/30%O<sub>2</sub>, at the temperatures 0, 5, 10, and 15 ° C

**Table Sup-1**

Average sensory scores of rainbow trout at different temperatures

| Storage temperature         | 0 °C                   | 5 °C                   | 10 °C                  | 15 °C                  |
|-----------------------------|------------------------|------------------------|------------------------|------------------------|
| Raw fillets appearance      | 8.34±0.08 <sup>a</sup> | 7.79±0.08 <sup>b</sup> | 7.06±0.07 <sup>c</sup> | 6.86±0.07 <sup>c</sup> |
| Raw fillets smell           | 7.70±0.08 <sup>a</sup> | 6.74±0.07 <sup>b</sup> | 5.64±0.09 <sup>c</sup> | 5.29±0.08 <sup>d</sup> |
| Cooked fillet taste         | 8.07±0.08 <sup>a</sup> | 7.35±0.08 <sup>b</sup> | 6.51±0.14 <sup>c</sup> | 6.16±0.16 <sup>d</sup> |
| Cooked fillet smell         | 8.49±0.06 <sup>a</sup> | 8.06±0.06 <sup>b</sup> | 7.23±0.07 <sup>c</sup> | 6.32±0.07 <sup>d</sup> |
| Total acceptance of fillets | 8.11±0.12 <sup>a</sup> | 7.58±0.10 <sup>b</sup> | 6.66±0.11 <sup>c</sup> | 5.75±0.09 <sup>d</sup> |

The values are expressed as the average of three samples.

**Table Sup-2**

The average sensory scores of rainbow trout in four types of modified atmosphere packaging (including P<sub>1</sub>:80% CO<sub>2</sub>/10% N<sub>2</sub>/10% O<sub>2</sub>, P<sub>2</sub>:60% CO<sub>2</sub>/20% N<sub>2</sub>/20% O<sub>2</sub>, P<sub>3</sub>:60% CO<sub>2</sub>/40% N<sub>2</sub>/0% O<sub>2</sub>, and P<sub>4</sub>:40% CO<sub>2</sub>/30% N<sub>2</sub>/30% O<sub>2</sub>)

| Packaging                   | P <sub>1</sub>         | P <sub>2</sub>         | P <sub>3</sub>         | P <sub>4</sub>         |
|-----------------------------|------------------------|------------------------|------------------------|------------------------|
| Raw fillets appearance      | 7.58±0.07 <sup>b</sup> | 7.29±0.09 <sup>c</sup> | 8.00±0.08 <sup>c</sup> | 7.19±0.07 <sup>c</sup> |
| Raw fillets smell           | 6.67±0.08 <sup>b</sup> | 6.19±0.07 <sup>c</sup> | 7.52±0.10 <sup>a</sup> | 5.43±0.08 <sup>d</sup> |
| Cooked fillet taste         | 7.60±0.08 <sup>a</sup> | 7.08±0.12 <sup>b</sup> | 7.52±0.10 <sup>a</sup> | 6.86±0.12 <sup>c</sup> |
| Cooked fillet smell         | 8.01±0.12 <sup>a</sup> | 7.39±0.09 <sup>b</sup> | 7.81±0.10 <sup>a</sup> | 6.88±0.10 <sup>c</sup> |
| Total acceptance of fillets | 7.41±0.11 <sup>a</sup> | 6.69±0.08 <sup>b</sup> | 7.30±0.10 <sup>a</sup> | 6.42±0.09 <sup>c</sup> |

The values are expressed as the average of three samples.

**Table Sup-3**

Average sensory scores of rainbow trout at different storage times

| Storage time (day)          | 0                      | 3                      | 6                      | 9                      | 12                     |
|-----------------------------|------------------------|------------------------|------------------------|------------------------|------------------------|
| Raw fillets appearance      | 9.00±0.08 <sup>a</sup> | 8.49±0.08 <sup>b</sup> | 7.67±0.09 <sup>c</sup> | 6.78±0.07 <sup>d</sup> | 5.61±0.07 <sup>e</sup> |
| Raw fillets smell           | 9.00±0.09 <sup>a</sup> | 7.66±0.09 <sup>b</sup> | 6.13±0.08 <sup>c</sup> | 4.95±0.08 <sup>d</sup> | 3.95±0.07 <sup>e</sup> |
| Cooked fillet taste         | 9.00±0.08 <sup>a</sup> | 7.76±0.08 <sup>b</sup> | 6.81±0.14 <sup>c</sup> | 6.20±0.16 <sup>d</sup> | 5.67±0.20 <sup>e</sup> |
| Cooked fillet smell         | 9.00±0.11 <sup>a</sup> | 8.43±0.10 <sup>b</sup> | 7.68±0.12 <sup>c</sup> | 6.70±0.09 <sup>d</sup> | 5.81±0.09 <sup>e</sup> |
| Total acceptance of fillets | 9.00±0.13 <sup>a</sup> | 7.94±0.11 <sup>b</sup> | 6.98±0.08 <sup>c</sup> | 6.03±0.10 <sup>d</sup> | 5.15±0.09 <sup>e</sup> |

The values are expressed as the average of three samples
